# Supplementary material for: Reverse electrical remodeling in rats with heart failure and preserved ejection fraction
Source: JCI journal article supplement (doi:10.1172/jci.insight.121123), 2018-10-03
Supplement: sd1 [file 1]

## Supplemental Material

**Supplemental Figure 1. A.** Left atrial size was increased in HFpEF rats compared to controls at baseline. Left atrial size was reduced in CDC-injected rats compared to PBS-injected rats ( $4.19 \pm 0.66$  mm in CDC vs.  $4.60 \pm 0.36$  mm in PBS,  $p < 0.05$ ). **B.** E' wave was decreased in HFpEF rats compared to controls at baseline. E' wave increased in CDC-injected rats compared to PBS rats but did not reach statistical significance ( $57.6 \pm 15.4$  in CDC vs.  $43.4 \pm 13.1$  in PBS,  $p = 0.15$ ). **C.** Number of extrastimuli to induce VA in HFpEF rats were not different between CDC and PBS rats. **D.** The intrinsicoid deflection time did not change in CDC and PBS rats. \* denotes  $p < 0.05$  and \*\*  $p < 0.001$ . Error line indicates mean and standard deviation. Mixed model regression was used for Supplemental Fig. 1A, B and D.

**Supplemental Figure 2. A, B.** Expression of Kv4.2 protein in cardiomyocytes did not change between groups. **C, D.** Expression of Kv1.4 protein were similar in PBS and CDC groups. **E, F.** Expression of KChIP2 protein were not changed after CDC or PBS treatment. Error line indicates mean and standard deviation. Mixed model regression was used for Supplemental Fig. 2B, D and F.

**Supplemental Figure 3. A, B** Connexin43 expressions in cardiomyocytes were not altered in PBS and CDC-injected HFpEF rats. Error line indicates mean and standard deviation. Mixed model regression was used for Supplemental Fig. 3B.
